# Supplementary material
Source: publisher site journal article supplement (https://www.dovepress.com/article/428470)
Supplement: Supplementary file 1 [file get_supplementary_file.php]

**Perception and Willingness to Use Telepharmacy Among the General Population in Jordan**

**Informed Consent Form**

**Dear participant**

Researchers from different Jordanian universities are conducting a research project to assess public perceptions and willingness to use “Telepharmacy” in Jordan.

Participation in this research study is voluntary, and you may choose not to participate. If you decide to participate in this research survey, you may withdraw anytime.

We want to confirm that all information provided here will be kept confidential, and all data will be stored in a password-protected electronic format. To help protect your confidentiality, the surveys will not contain information that will personally identify you, and will be used only for research purposes.

The procedure involves filling out an online survey that will take approximately 5 minutes. Your participation in completing this survey is highly appreciated.

**ELECTRONIC CONSENT**: Please select your choice below.

Clicking on the "agree" button below indicates that:

1. You have read the above information
2. You voluntarily agree to participate

If you do not wish to participate in the research study, please decline participation by clicking the "disagree" button.

- Agree
- Disagree

**Perception and Willingness to Use Telepharmacy Among the General Population in Jordan**

**Part 1. Demographic Information**

Age: ____________________ (years)

Gender:

 Female  Male

Education level:

 Not educated  School level

 University student  University graduate

 Post-graduate degree

Personal income

 <400 JD/month  401-800 JD/month

 801-1200 JD/month  >1200 JD/month

Marital status

 Married  Single

 Divorced  Widowed

Do you have children?

 Yes  No

Place of residence

 Central of Jordan  North of Jordan

 South of Jordan

Do you have a biomedicine-related degree?

 Yes  No

Do you suffer from chronic diseases?

 Yes  No

Frequency of visiting a community pharmacy per month

- 0-1 times  2-4 times  More than 4 times per month

**Part 2: Public awareness about telepharmacy service**

Have you ever heard about telepharmacy?

- Yes
- No

**Note: knowing that Telepharmacy is defined as: “Telepharmacy is the delivery of pharmaceutical care via telecommunications to patients in locations where they may not have direct contact with a pharmacist”.**

Have you ever used telepharmacy service before?

- Yes
- No

**Part 3: Public Perceived Benefits of Telepharmacy**

**From the following statements, please select your level of agreement with each sentence**

| **No.** | **Statements** | **Strongly agree** | **Agree** | **Neutral** | **Disagree** | **Strongly disagree** |
| --- | --- | --- | --- | --- | --- | --- |
| **1** | Telepharmacy helps in reducing unnecessary visits to pharmacies | **** | **** | **** | **** | **** |
| **2** | Telepharmacy improves patients’ medication adherence | **** | **** | **** | **** | **** |
| **3** | Telepharmacy helps patients save their money to reach the pharmacies | **** | **** | **** | **** | **** |
| **4** | Telepharmacy helps patients save their travel time to reach the pharmacies | **** | **** | **** | **** | **** |
| **5** | Information technology knowledge is important for patients on how to conduct Telepharmacy | **** | **** | **** | **** | **** |
| **6** | Telepharmacy solves the waiting time problem in most pharmacies | **** | **** | **** | **** | **** |
| **7** | Telepharmacy protects patients during pandemics | **** | **** | **** | **** | **** |
| **8** | Telepharmacy is effective in providing health education and patient counseling | **** | **** | **** | **** | **** |
| **9** | Telepharmacy is more convienient to patients living in rural area | **** | **** | **** | **** | **** |
| **10** | Telepharmacy services allow prompt patients interventions. | **** | **** | **** | **** | **** |
| **11** | Telepharmacy services may enhance patients communication with their healthcare providers | **** | **** | **** | **** | **** |

**Part 4: Public Perceived Drawback for Using Telepharmacy**

**From the following statements, please select your level of agreement with each sentence**

| **No.** | **Statements** | **Strongly agree** | **Agree** | **Neutral** | **Disagree** | **Strongly disagree** |
| --- | --- | --- | --- | --- | --- | --- |
| **1** | Telpharmacy services require a lot of mental effort by the patients and the pharmacists | **** | **** | **** | **** | **** |
| **2** | Telepharmacy may threatens information confidentiality and patients’ privacy | **** | **** | **** | **** | **** |
| **3** | Telepharmacy may contribute to communication errors between the patient and pharmacist | **** | **** | **** | **** | **** |
| **4** | Patients might be unable to build a professional relationship with pharmacist using telepharmacy service | **** | **** | **** | **** | **** |
| **5** | Telepharmacy may contribute to medication dispensing errors due to the nature of virtual interaction | **** | **** | **** | **** | **** |
| **6** | Telepharmacy reduce the social and empathic aspects of care | **** | **** | **** | **** | **** |
| **7** | Telepharmacy is associated with excessive cost of transporting medication | **** | **** | **** | **** | **** |

**Part 5: Public willingness to use telepharmacy service**

If telepharmacy service become available in Jordan, are you willing to use the service in the future?

- Yes
- No
- I don’t know

What types of pharmaceutical services are you willing to use?

| **No.** | **Statements** | **Yes** | **No** |
| --- | --- | --- | --- |
| **1** | Remote patient counseling | **** | **** |
| **2** | Remote dispensing of medication | **** | **** |
| **3** | Remote home medication review | **** | **** |
| **4** | Remote monitoring of medication adherence | **** | **** |
| **5** | Remote monitoring of adverse drug reactions | **** | **** |
| **6** | Remote identification of any medication errors | **** | **** |
